# Supplementary material for: System-level network analysis of nitrogen starvation and recovery in Chlamydomonas reinhardtii reveals potential new targets for increased lipid accumulation
Source: PubMed Central journal article supplement (PMC4320484; doi:10.1186/s13068-014-0171-1), 2014-12-24
Supplement: 13068_2014_171_MOESM3_ESM.pdf [file 13068_2014_171_MOESM3_ESM.pdf]

photosynthesis.png  
 mapping: 20130112 MapManChlamy5+ChloroMito-LV.xls  
 mapped: 1571 of 1534 data points  
 visible: 86 data points  
 data: T0  
 data: T5  
 data: T24  
 data: T72  
 data: T77  
 data: T96

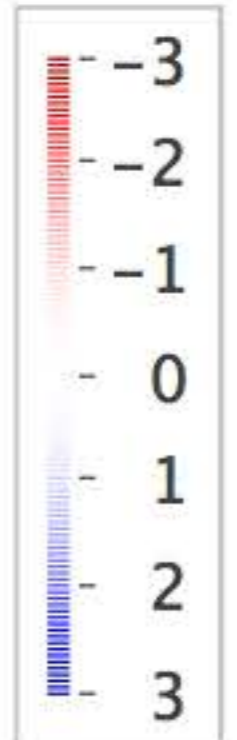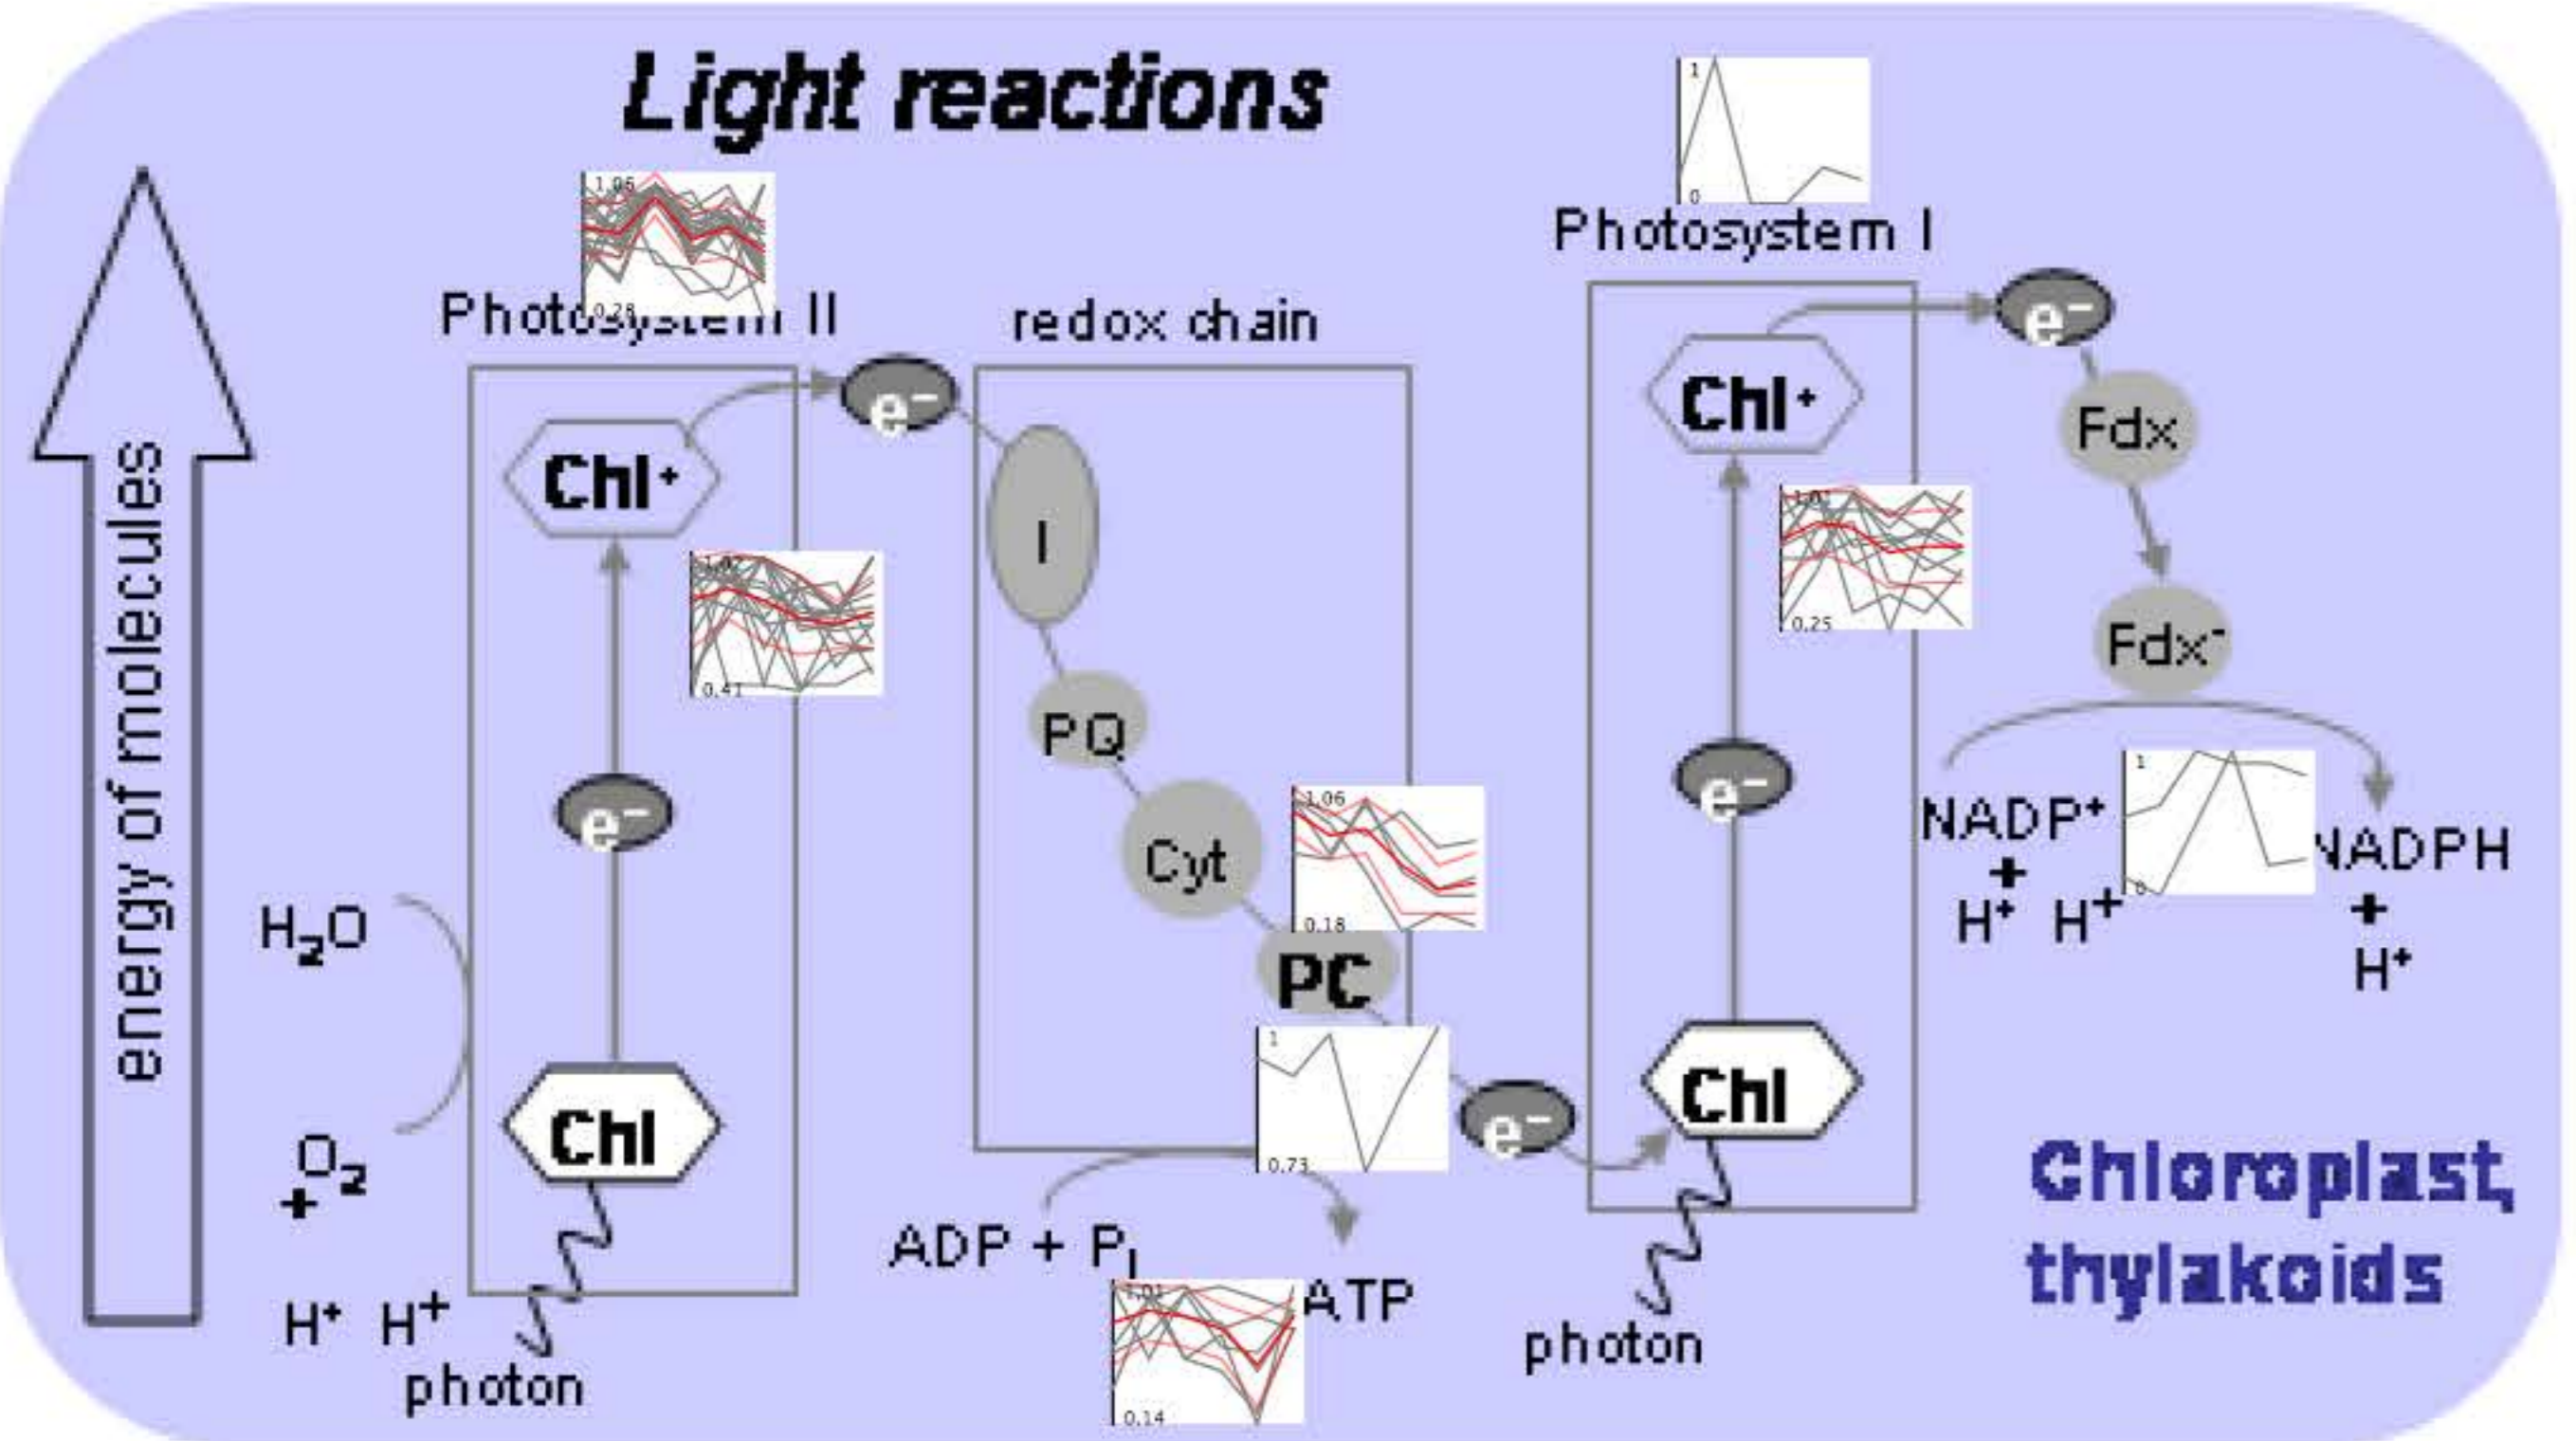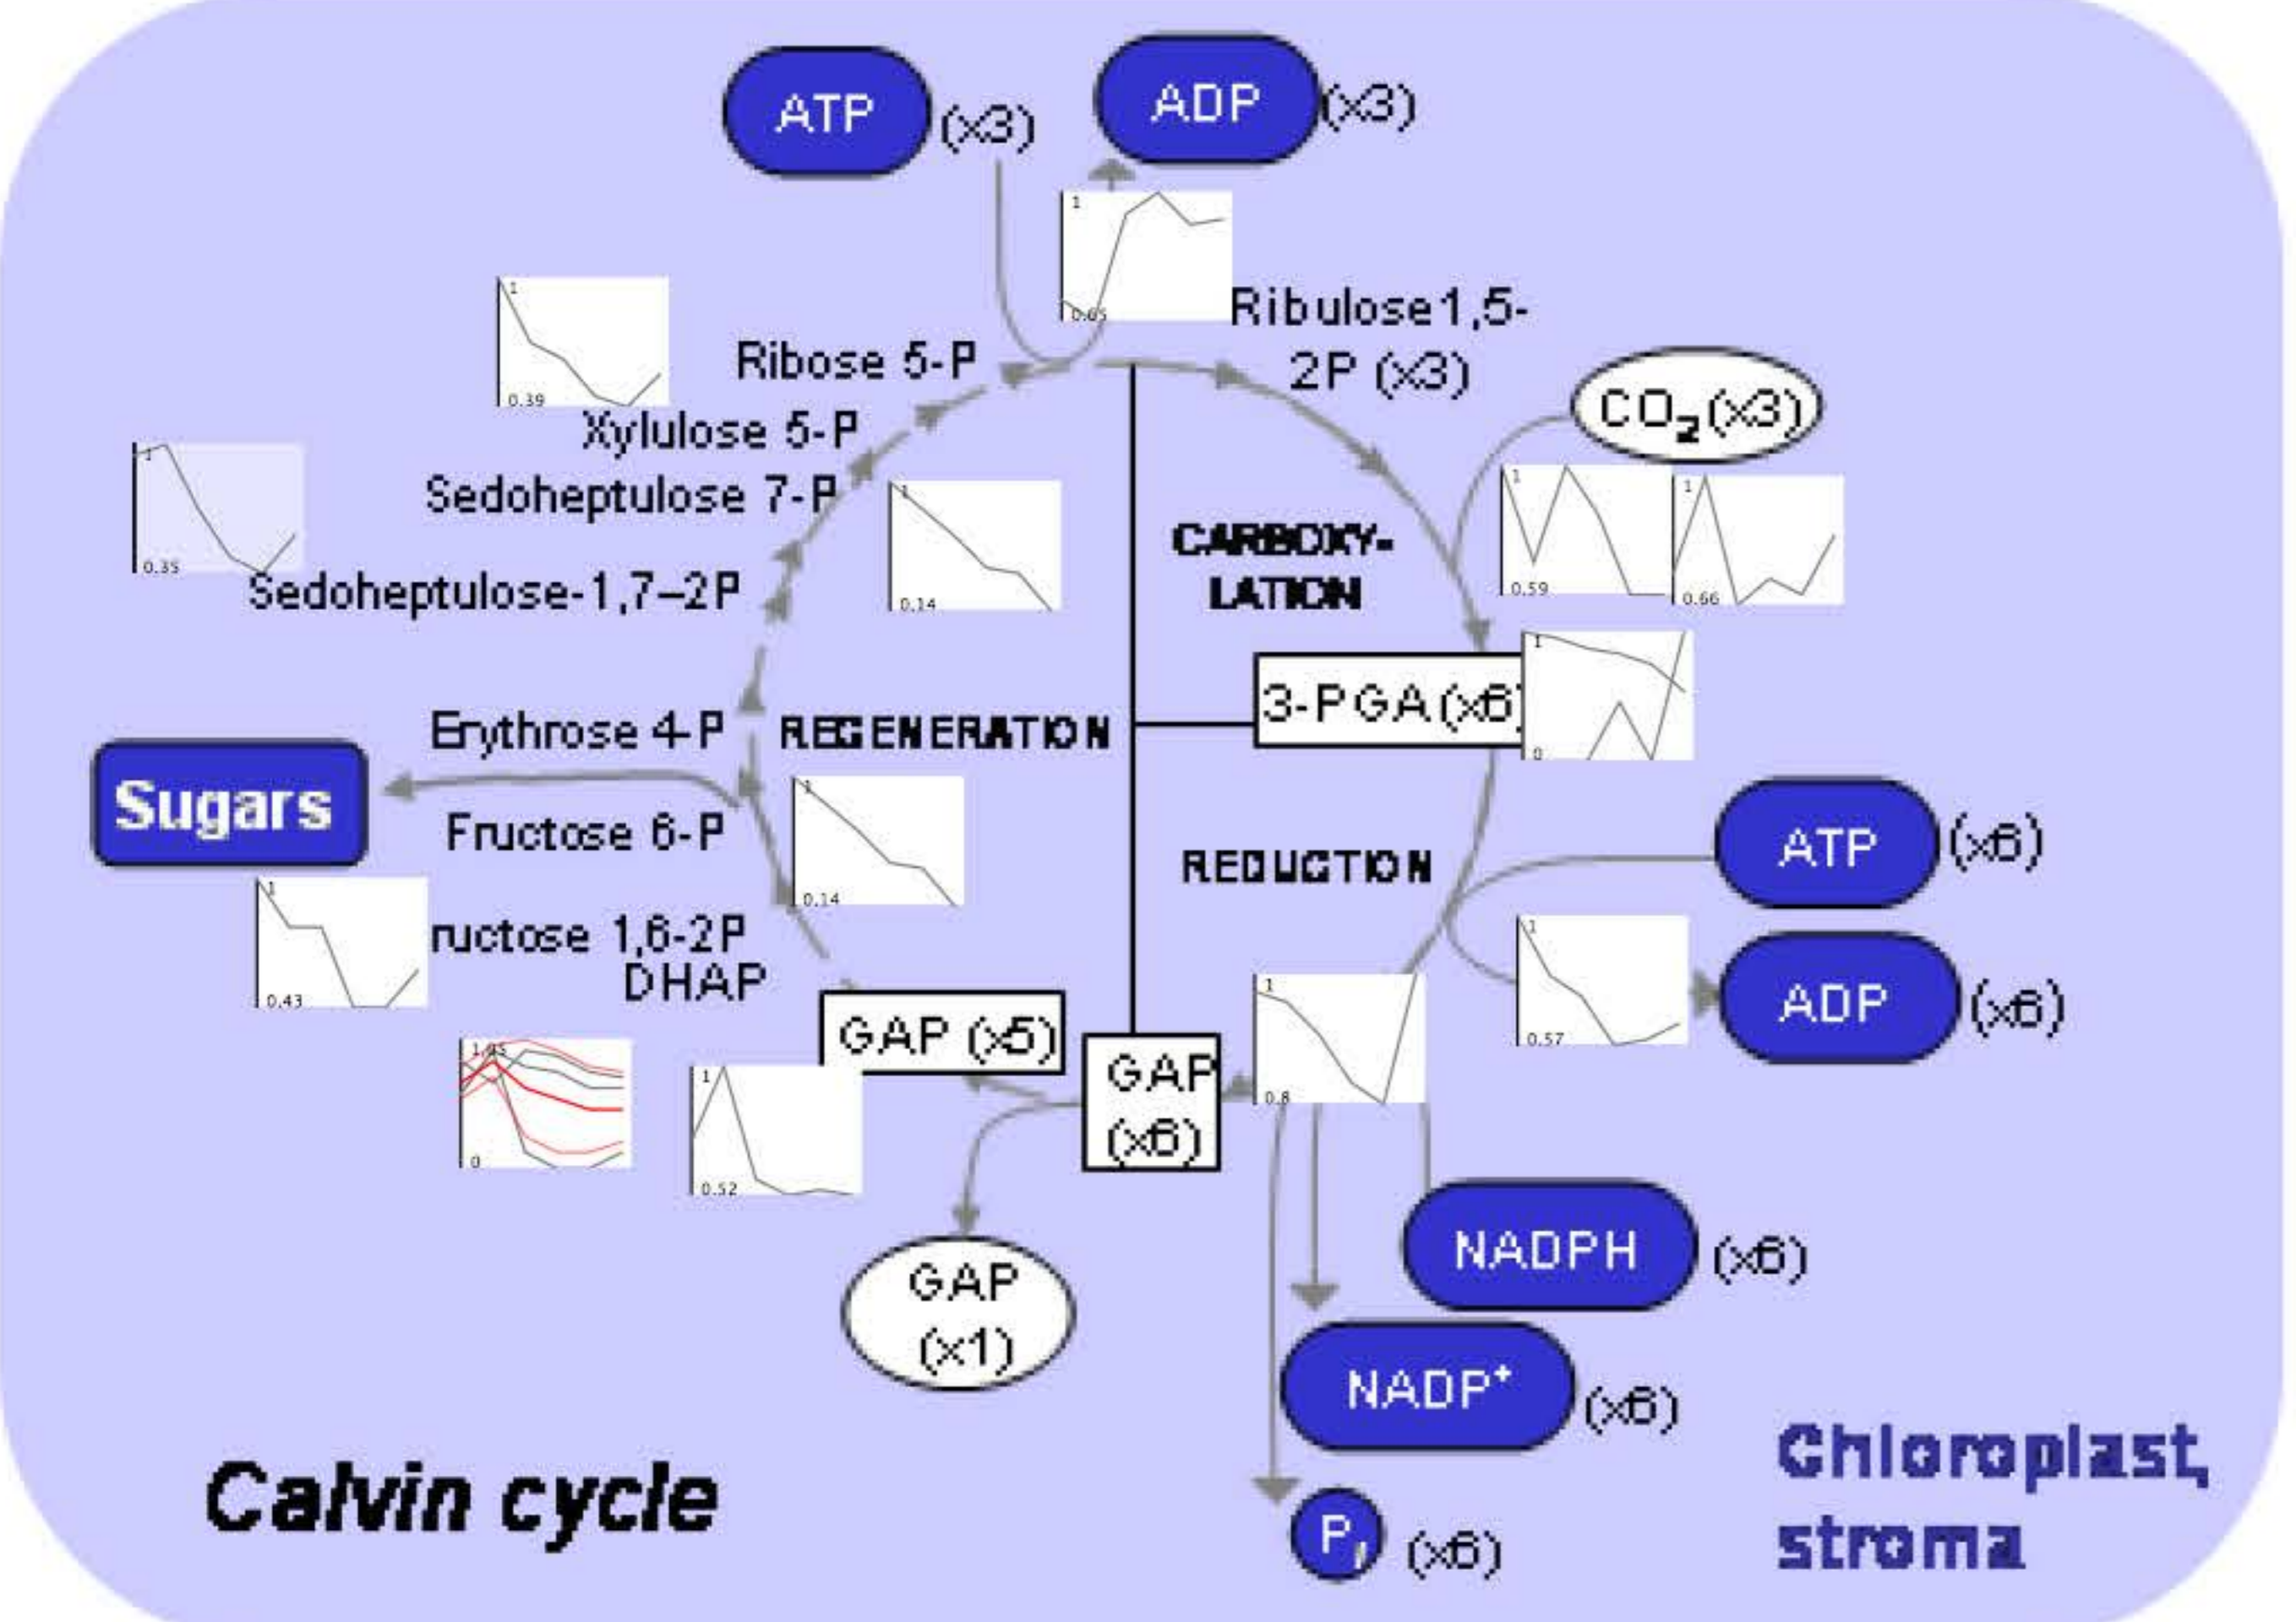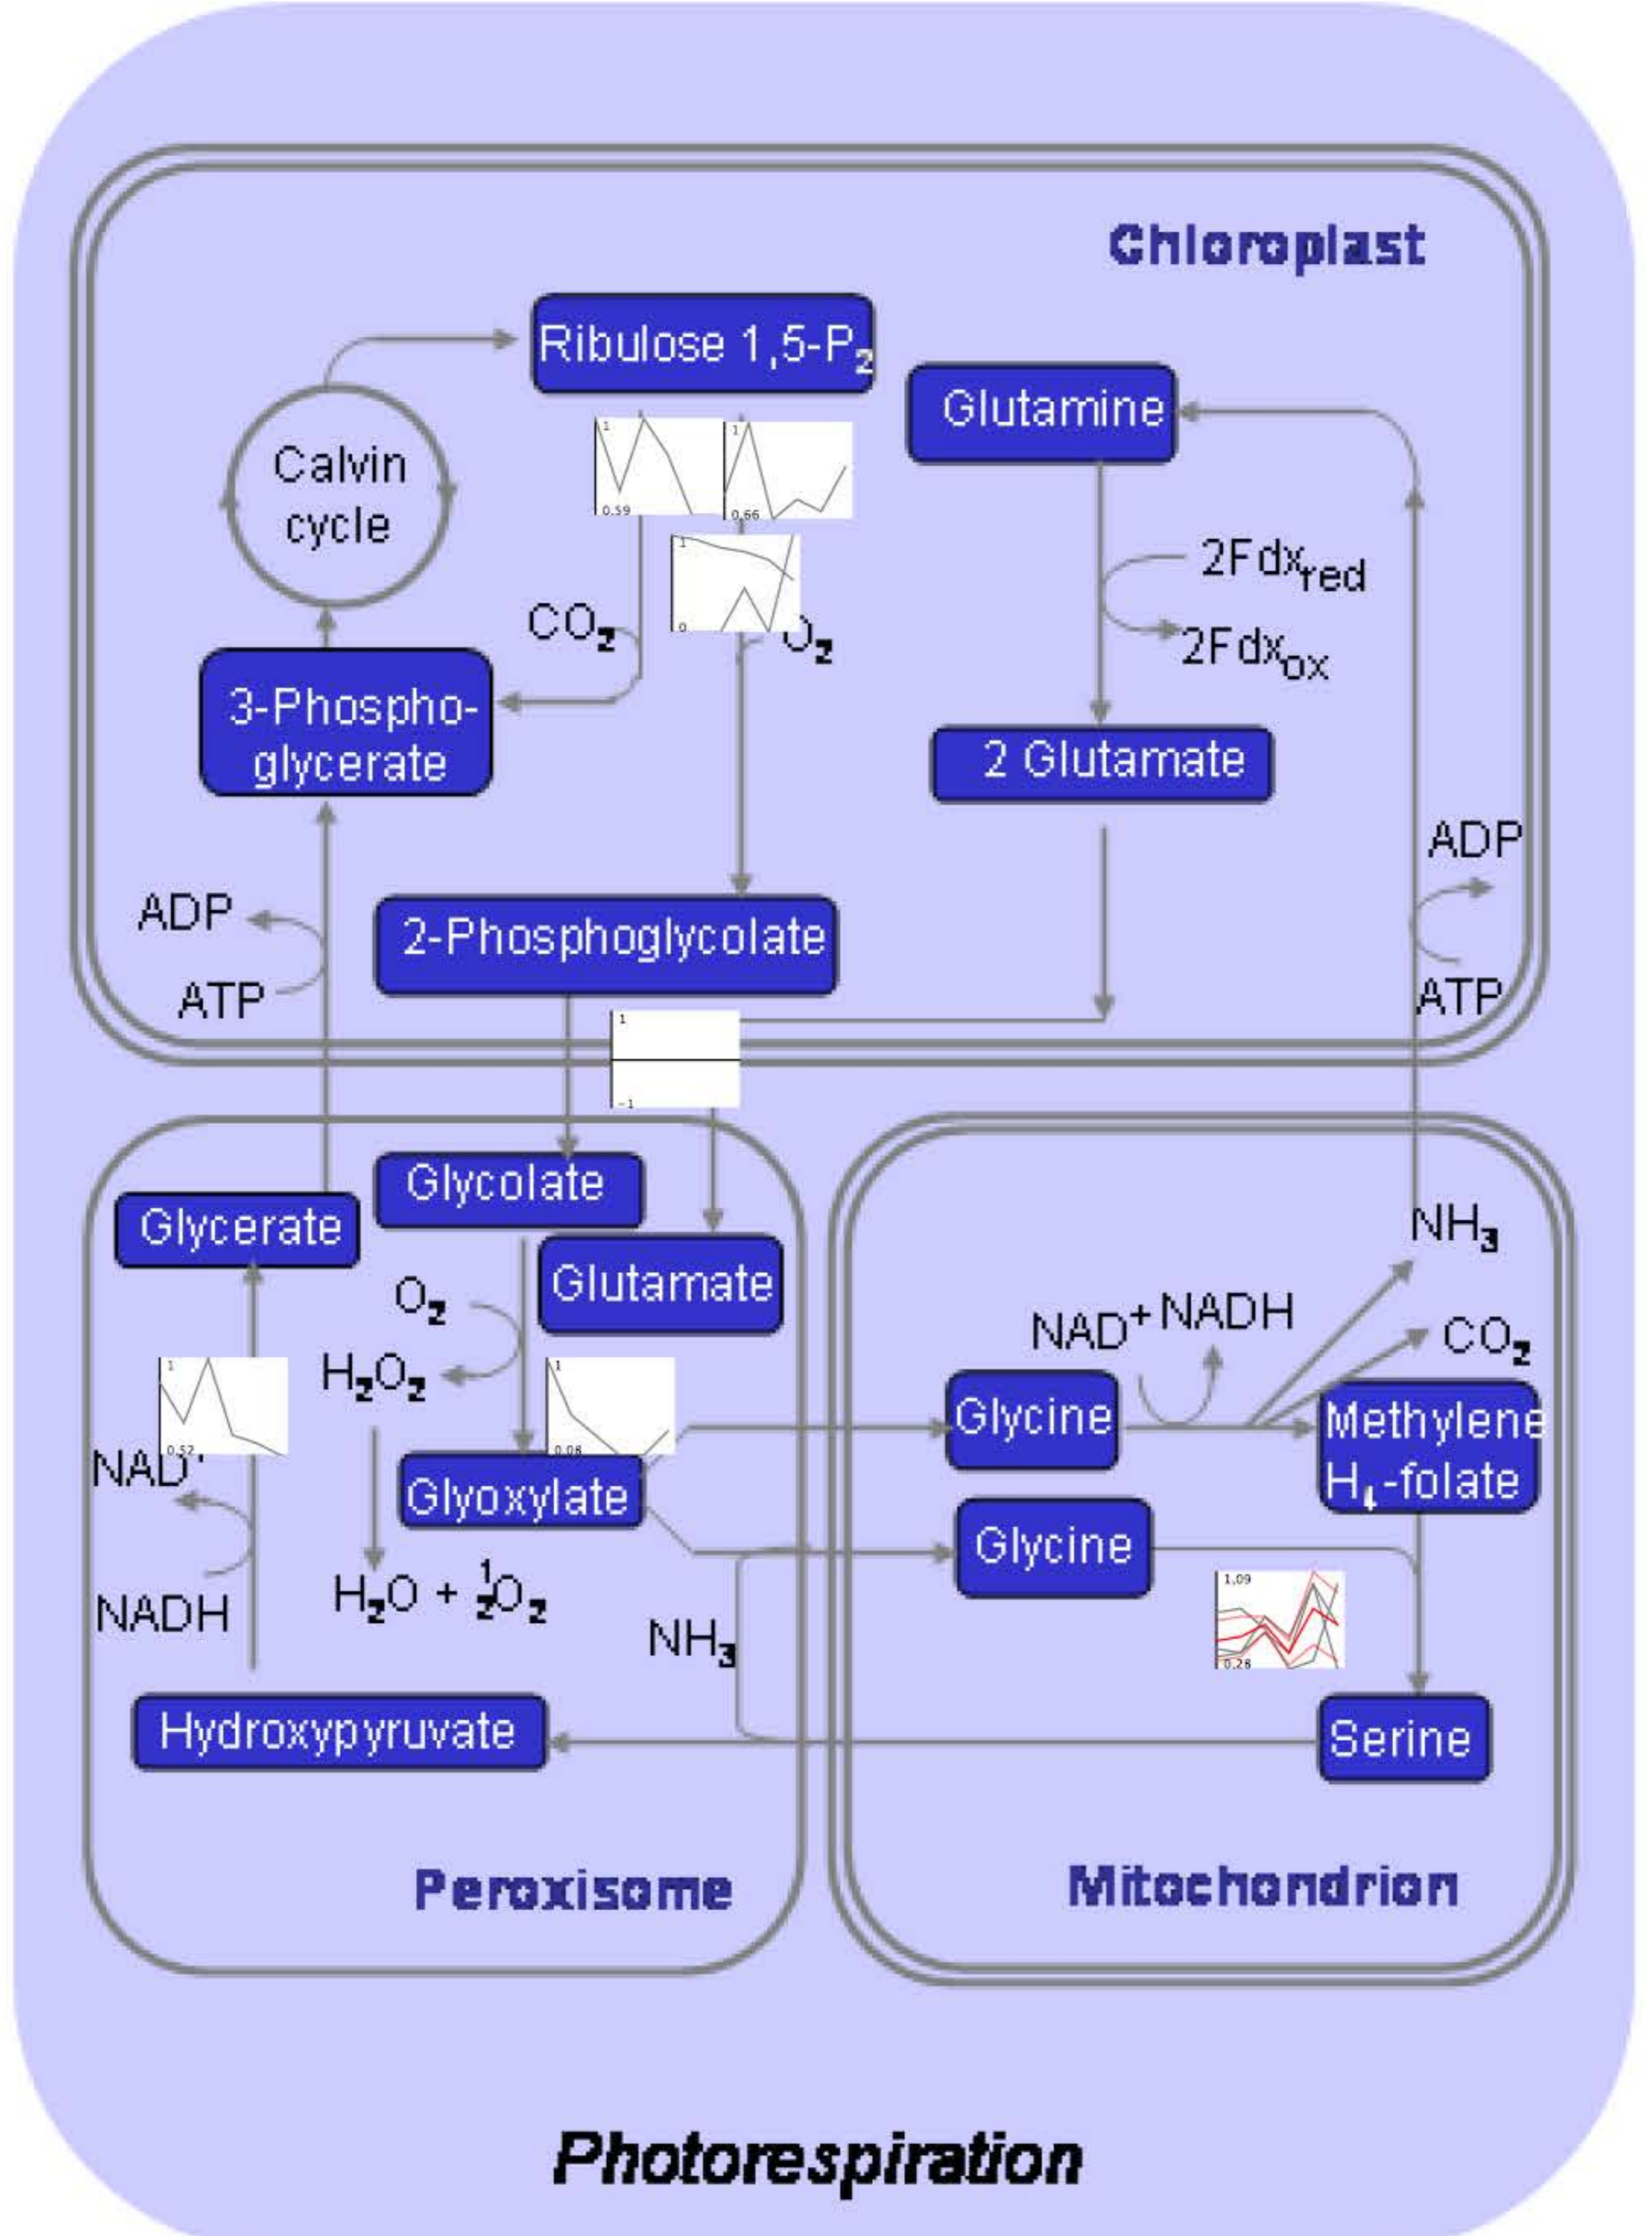

*Photorespiration*
