# Supplementary material for: System-level network analysis of nitrogen starvation and recovery in Chlamydomonas reinhardtii reveals potential new targets for increased lipid accumulation
Source: PubMed Central journal article supplement (PMC4320484; doi:10.1186/s13068-014-0171-1), 2014-12-24

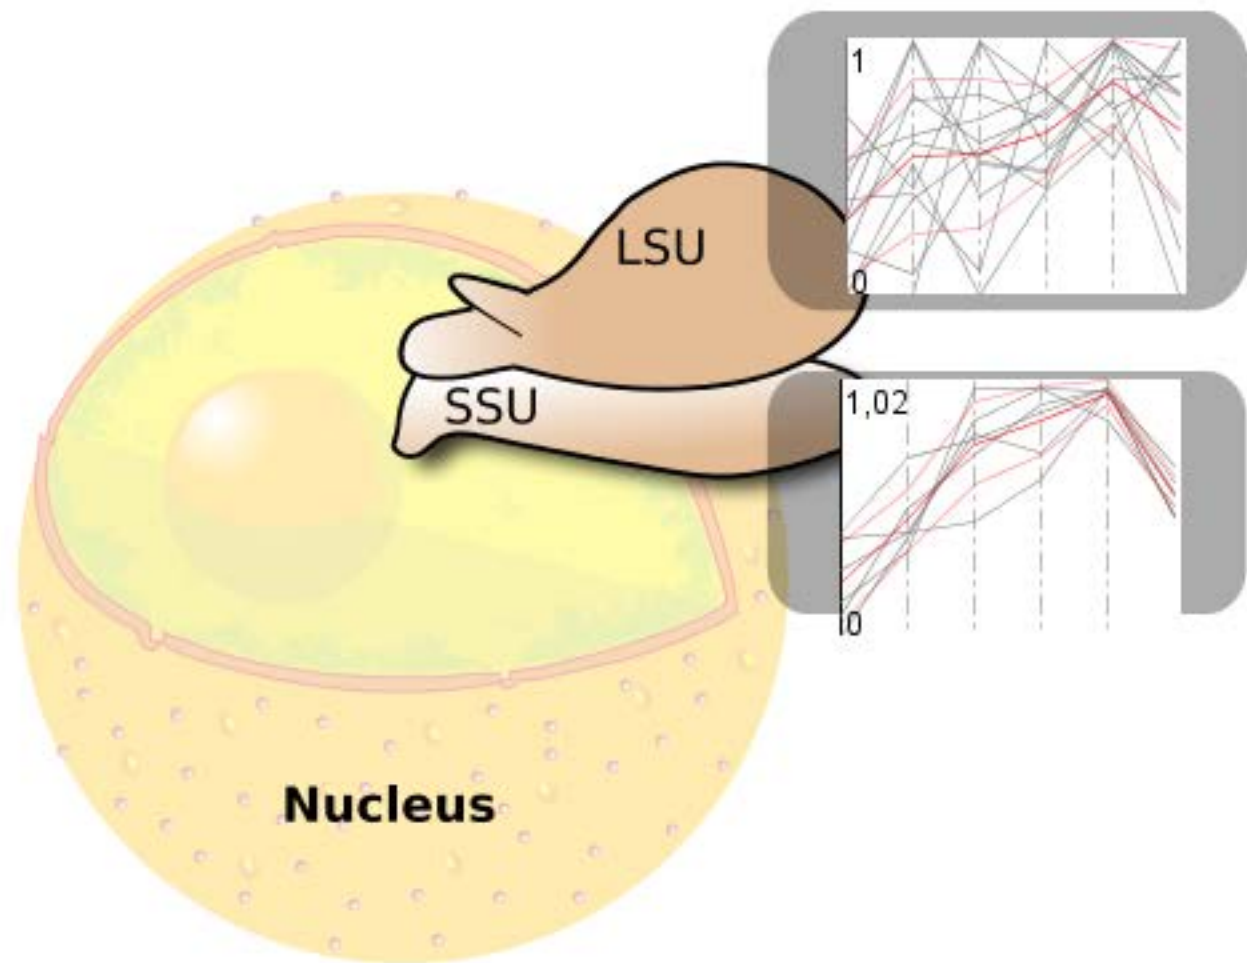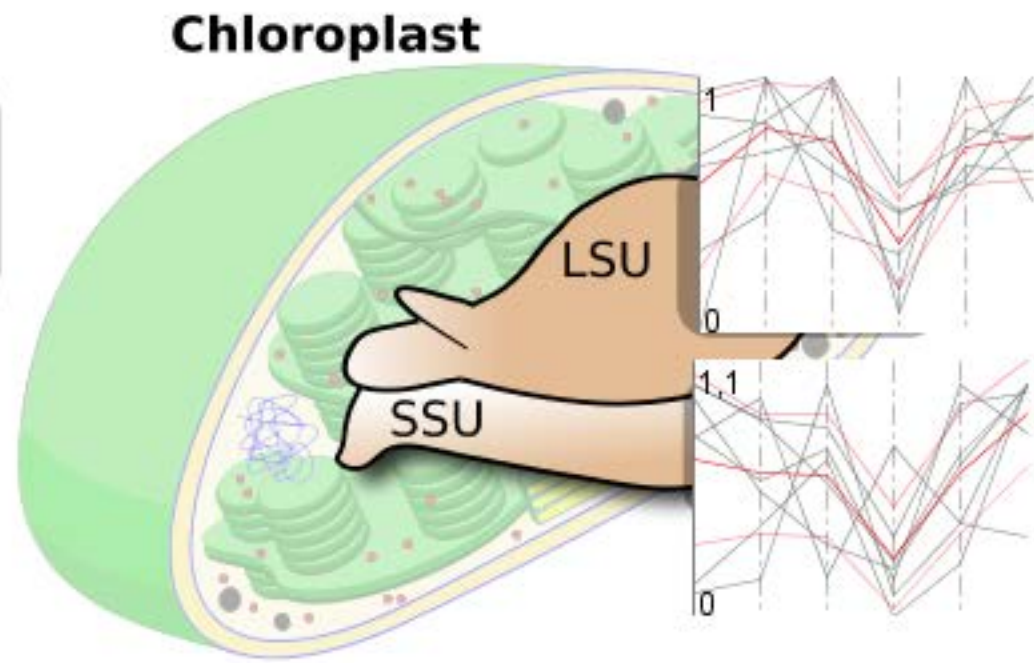

Supplement: 13068_2014_171_MOESM5_ESM.pdf [file 13068_2014_171_MOESM5_ESM.pdf]
