# Supplementary material for: System-level network analysis of nitrogen starvation and recovery in Chlamydomonas reinhardtii reveals potential new targets for increased lipid accumulation
Source: PubMed Central journal article supplement (PMC4320484; doi:10.1186/s13068-014-0171-1), 2014-12-24
Supplement: 13068_2014_171_MOESM7_ESM.pdf [file 13068_2014_171_MOESM7_ESM.pdf]

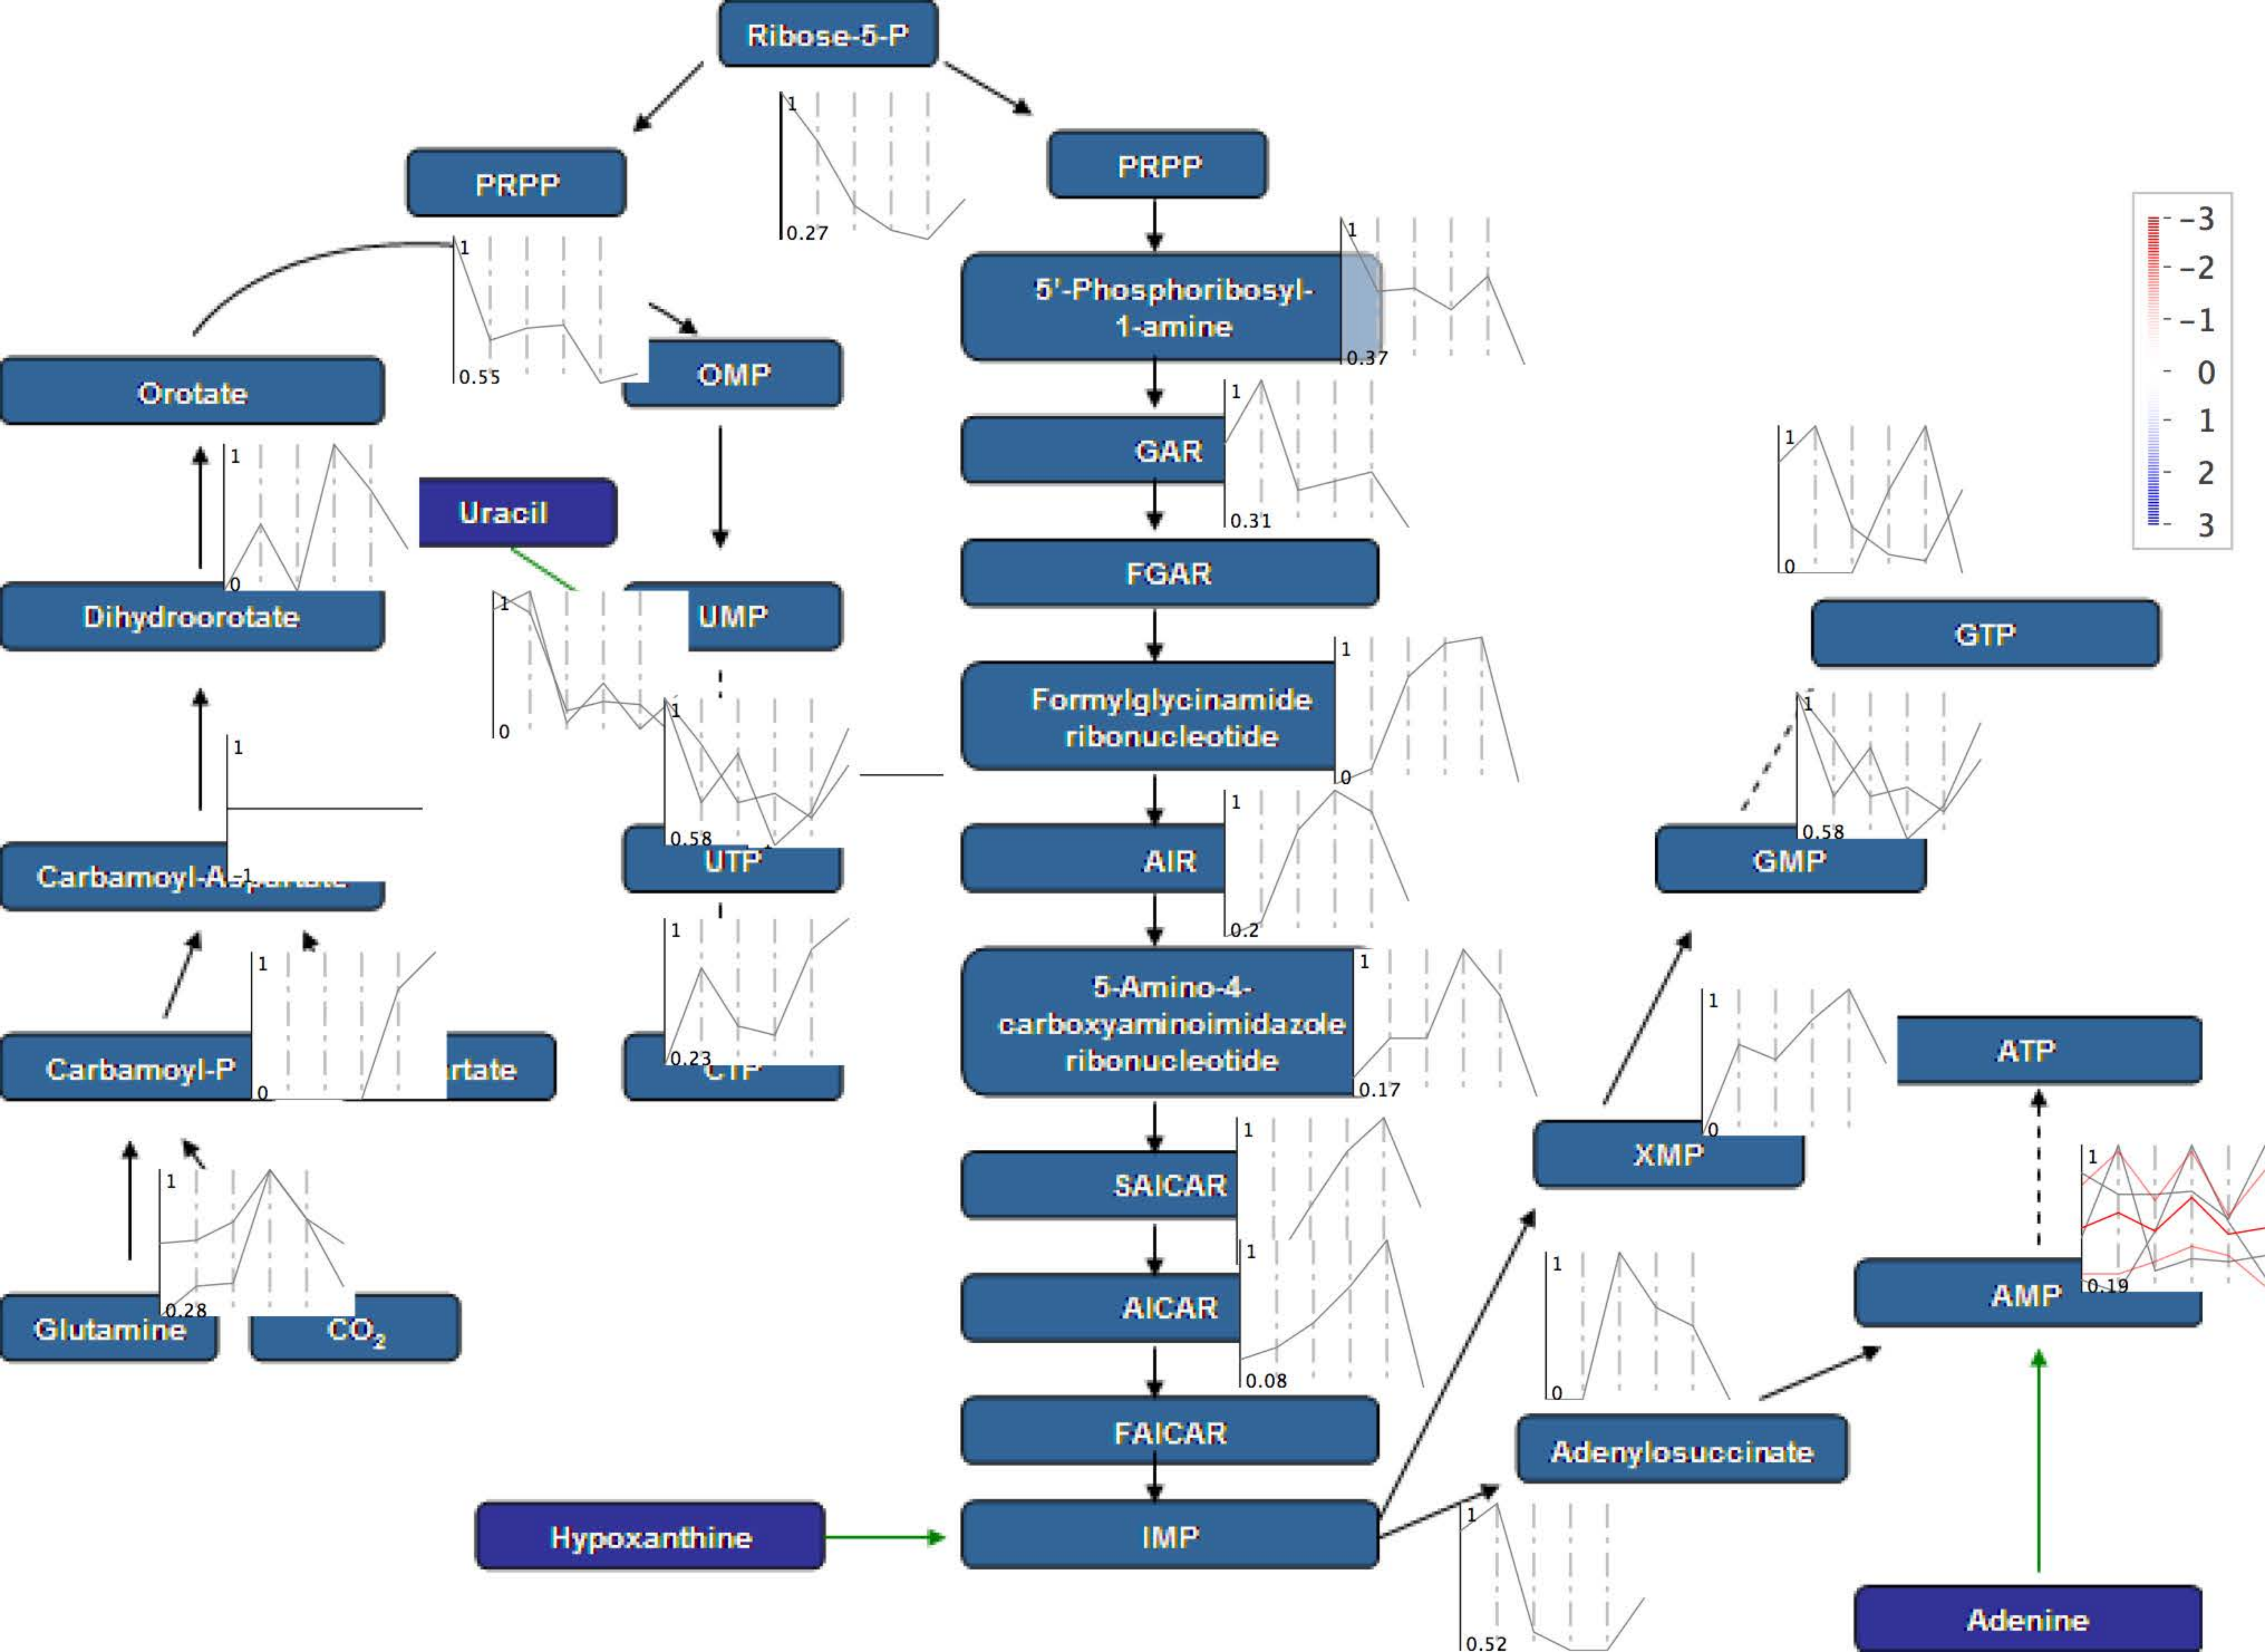

Nucleotide Synthesis.png

mapping: 20130112 MapManChlamy5+Chl

mapped: 1571 of 1534 data points

visible: 28 data points

data: T0

data: T5

data: T24

data: T72

data: T77

data: T96
